# Supplementary material
Source: Springer Nature journal article supplement (https://www.springermedizin.de/resource/supplementary/13017_2009_130_MOESM3_ESM.pdf/9635532)

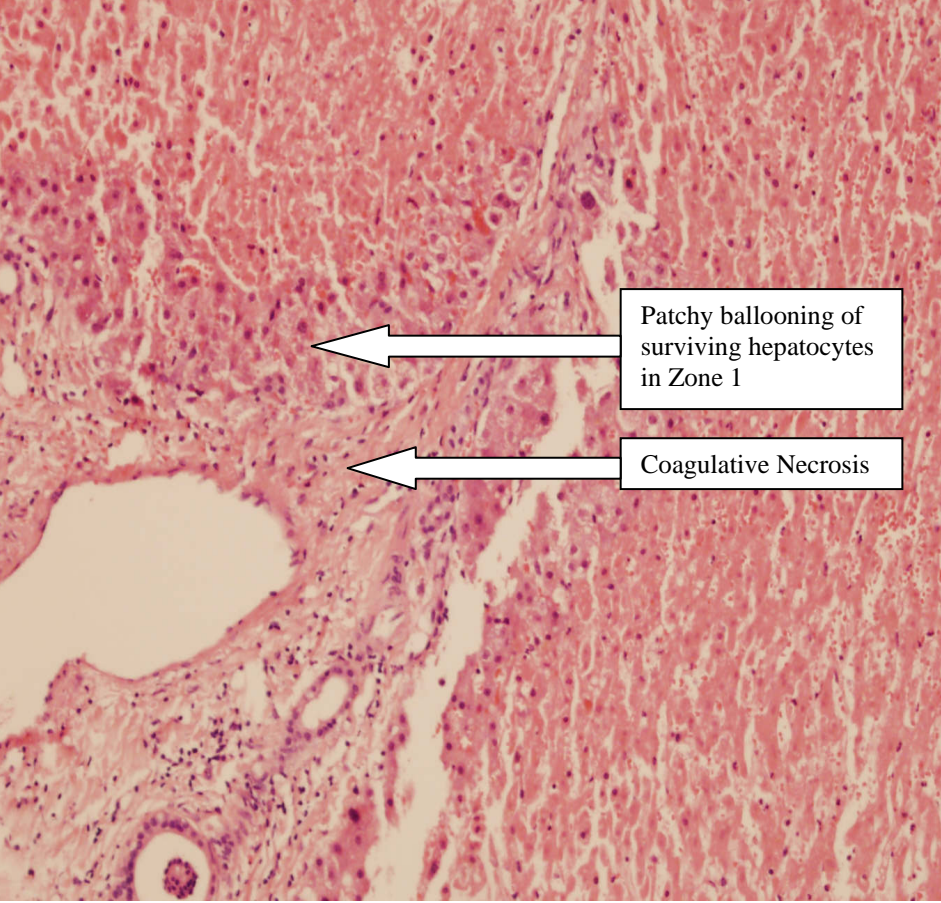

Patchy ballooning of surviving hepatocytes in Zone 1

Coagulative Necrosis

Supplement: MOESM3 [file 9635532]
